# Supplementary material for: Isopropylation of 2-naphthol over mesoporous silicoaluminophosphate-37 (MESO-SAPO-37): the effect of bond dissociation energy on product distribution
Source: Royal Society of Chemistry journal article supplement (doi:10.1039/c5nj02451j), 2016-01-01
Supplement: c5nj02451j1.pdf [file c5nj02451j1.pdf]

## Isopropylation of 2-naphthol over mesoporous silicoaluminophosphate-37 (MESO-SAPO-37): Effect of bond dissociation energy on product distribution

Rekha Yadav, Ayyamperumal Sakthivel\*  
*Catalysis and Materials Chemistry Laboratory, Department of Chemistry*  
*University of Delhi, Delhi 110 007*  
Email: [sakthiveldu@gmail.com](mailto:sakthiveldu@gmail.com) / [asakthivel@chemistry.du.ac.in](mailto:asakthivel@chemistry.du.ac.in)

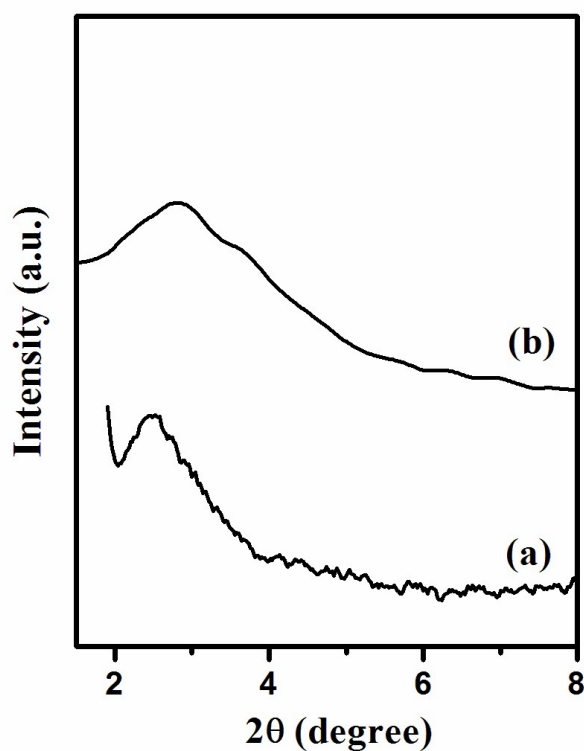

**Figure S1.** Powder XRD pattern for calcined (a) MESO-SAPO-37-0.43, (b) MESO-SAPO-37-0.80.

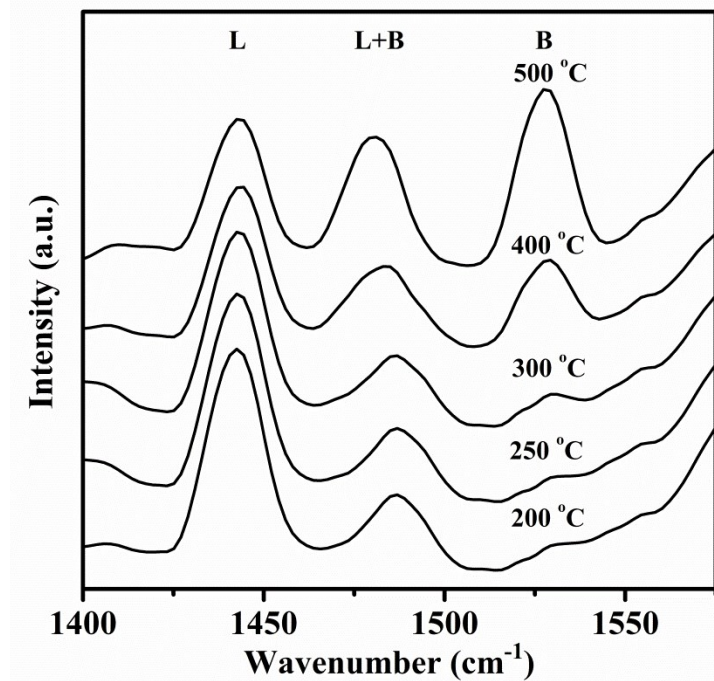

**Figure S2.** Pyridine FT-IR profile of calcined MESO-SAPO-37-0.43 (reproduced with permission from reference 28)

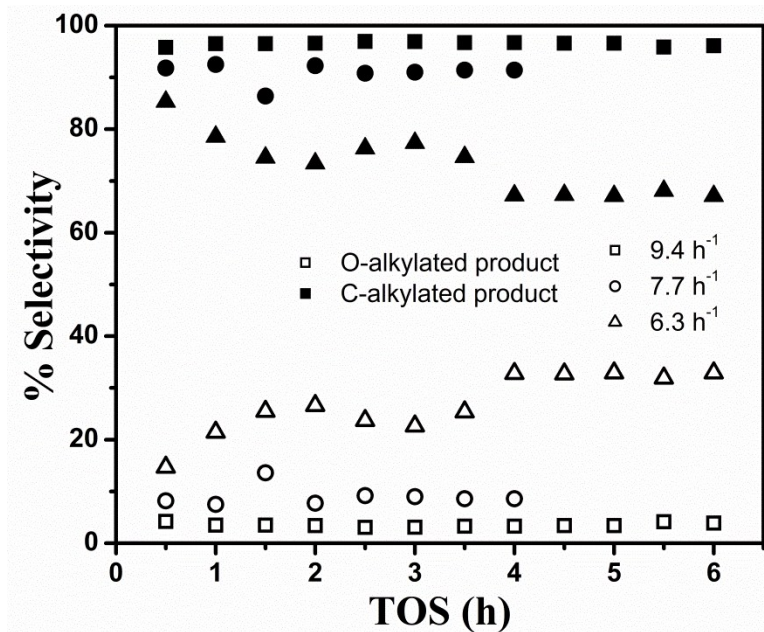

**Figure S3.** Selectivity of O-alkylated and C-alkylated products for 2-NP with IPA at different WHSV at 200 °C with mole ratio (2-NP: IPA) of 1: 20 over the period of TOS.

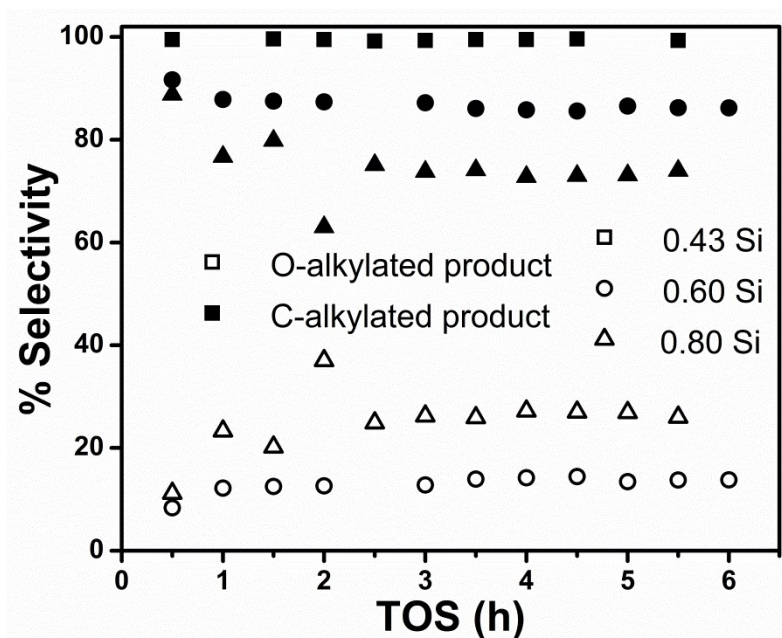

**Figure S4.** Selectivity of O-alkylated and C-alkylated products for 2-NP with IPA for catalysts with different silica content at 250 °C with WHSV= 9.4 h<sup>-1</sup> and mole ratio 1:20.
